# Supplementary material for: Oxygen permeation and stability of Mo-substituted BSCF membranes
Source: Royal Society of Chemistry journal article supplement (doi:10.1039/c5ta04046a), 2015-01-01
Supplement: c5ta04046a1.pdf [file c5ta04046a1.pdf]

Supplementary Information

## Oxygen permeation and stability of Mo-substituted BSCF membranes

H. Gasparyan<sup>a</sup>, J. B. Claridge<sup>a</sup> and M. J. Rosseinsky<sup>\*a</sup>

<sup>a</sup> Department of Chemistry, University of Liverpool, Liverpool L69 7ZD, United Kingdom.

[rossein@liv.ac.uk](mailto:rossein@liv.ac.uk)

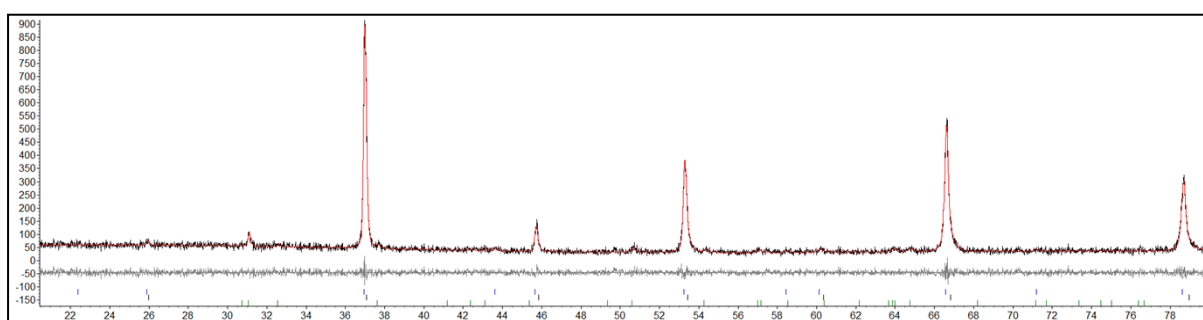

S1: Pawley refinement (red line) of XRD data for  $\text{Ba}_{0.5}\text{Sr}_{0.5}\text{Co}_{0.5}\text{Fe}_{0.125}\text{Mo}_{0.375}\text{O}_{3-\delta}$  powders (black line) sintered at 1200 °C for 5 hours. Reflection marks refer to SP (black), DP (blue) and  $\text{BaMoO}_4$  (green  $a = \text{Å}$ ). The gray line represents the difference between calculated and measured data.

| Lattice parameters     |                            | Refinement parameters |      |
|------------------------|----------------------------|-----------------------|------|
| Space group            | $a, b, c / \text{Å}$       | $R_{\text{wp}} / \%$  | 14.5 |
| DP $Fm\bar{3}m$        | $a=7.9857(3)$              | $R_{\text{exp}} / \%$ | 13.6 |
| SP $Pm\bar{3}m$        | $a=3.9787(5)$              | $\chi^2$              | 1.06 |
| $\text{BaMoO}_4 I41/a$ | $a=5.5465(7) c=12.7643(9)$ |                       |      |

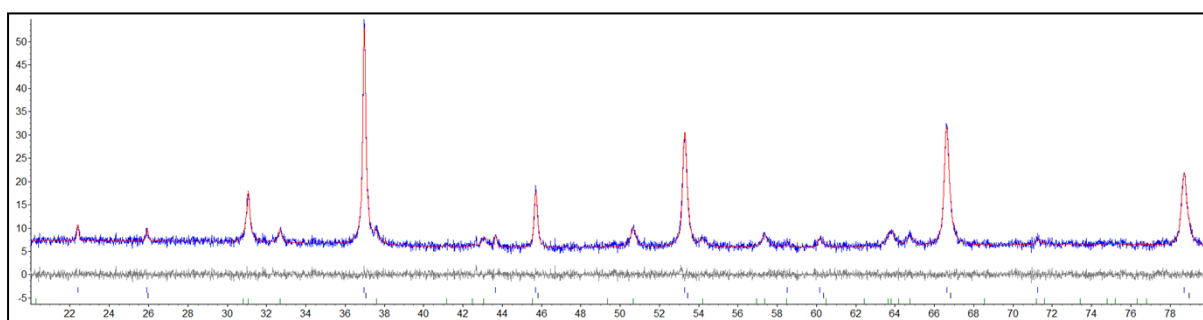

S2: Pawley refinement (red line) of XRD data for  $\text{Ba}_{0.5}\text{Sr}_{0.5}\text{Co}_{0.5}\text{Fe}_{0.125}\text{Mo}_{0.375}\text{O}_{3-\delta}$  powders (blue line) sintered at 1250°C for 5 hours. Reflection marks refer to SP (black), DP (blue) and

BaMoO<sub>4</sub> (green). The gray line represents the difference between calculated and measured data.

| Lattice parameters              |                          | Refinement parameters |      |
|---------------------------------|--------------------------|-----------------------|------|
| Space group                     | a, b, c / Å              | R <sub>wp</sub> / %   | 13.0 |
| DP <i>Fm</i> $\bar{3}$ <i>m</i> | a=7.9798(2)              | R <sub>exp</sub> / %  | 12.0 |
| SP <i>Pm</i> $\bar{3}$ <i>m</i> | a=3.9793(7)              | $\chi^2$              | 1.07 |
| BaMoO <sub>4</sub> <i>I41/a</i> | a=5.5532(8) c=12.7096(1) |                       |      |

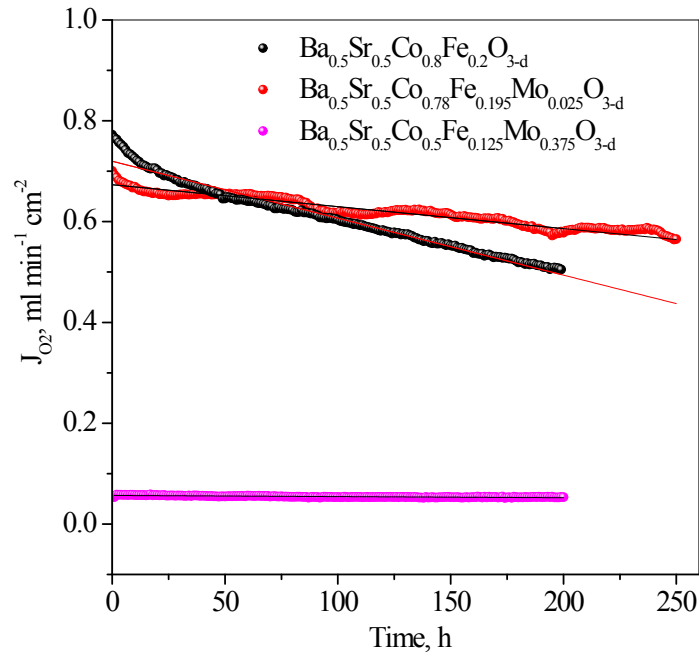

S3: Time dependence of oxygen permeation flux at 750 °C in 100/100 ml/min air/He for 1 mm BSCF,  $Ba_{0.5}Sr_{0.5}Co_{0.78}Fe_{0.195}Mo_{0.025}O_{3-d}$  and  $Ba_{0.5}Sr_{0.5}Co_{0.5}Fe_{0.125}Mo_{0.375}O_{3-d}$  membranes.  $Ba_{0.5}Sr_{0.5}Co_{0.78}Fe_{0.195}Mo_{0.025}O_{3-d}$  membrane was tested for additional 50 hours and is compared with BSCF (experimental data are extrapolated to 250 hours).
